# Supplementary material for: Stabilized carbenes do not dimerize
Source: Royal Society of Chemistry journal article supplement (doi:10.1039/b003588m), 2000-01-01
Supplement: table.doc [file table.doc]

**Supporting Information Table S1**

**Total energies (Etot) of the investigated carbenes at the MP2/6-311+G(2d) and B3LYP/6-311+G(2d) levels.**

| Molecules | Etota | Etotb |
| --- | --- | --- |
| HCLi | -45.85618 | -46.05308 |
| HCBeH | - | -53.88949 |
| HCBH2a | - | - |
| HCCH3 | -78.20426 | -78.49008 |
| HCNH2 | -94.31594 | -94.60208 |
| HCOH | -114.15996 | -114.45518 |
| HCF | -138.14525 | -138.45356 |
| HCNa | -200.25485 | -200.82321 |
| HCMgH | -238.61143 | -239.22306 |
| HCAlH2 | -281.55327 | -282.20111 |
| HCSiH3 | -329.18455 | - |
| HCPH2 | -380.48692 | -381.16803 |
| HCSH | -436.73837 | -437.42863 |
| HCCl | -498.11342 | -498.80775 |
| C(NH2)2 | -149.58451 | -150.01233 |
| C(OH)2 | -189.31303 | -189.75560 |
| C(SH)2 | -834.44452 | -835.67691 |
| COHNH2 | -169.45227 | -169.88651 |
| CSHNH2 | -492.01599 | -492.84487 |
| 1 (R=H) | -225.60801 | -226.23538 |
| 1 (R=Me) |  | -304.87404 |
| 2 (R=H) | -568.05172 | -569.07579 |
| 3 | -225.77538 | -227.43868 |
| 4 | -910.49612 | -911.91591 |
| 5 | -533.73428b | -534.84704 |
| 6 | -247.55023 | -248.27855 |

**Supporting Information Table S2**

Calculated structural parameters (in angstrom and degrees) for mono- and disubstituted carbenes investiagted

|  | C-X (Å)a | CXH (deg)a | C-X (Å)b | CXH (deg)b |
| --- | --- | --- | --- | --- |
| HCLi | 1.853 | 180.0 | 1,872 | 180,0 |
| HCBeH | - | - | - | - |
| HCBH2a | - | - | - | - |
| HCCH3 | 1.453 | 106.4 | 1.449 | 106.6 |
| HCNH2 | 1.306 | 106.6 | 1.309 | 106.4 |
| HCOH | 1.305 | 107.3 | 1.313 | 107.8 |
| HCF | 1.313 | 102.1 | 1.321 | 101.9 |
| HCNa | 2.374 | 108.8 | 2.383 | 115.1 |
| HCMgH | 2.126 | 120.0 | 2.111 | 127.1 |
| HCAlH2 | 1.883 | 143.4 | 1.890 | 111.8 |
| HCSiH3 | - | - | 1.862 | 110.9 |
| HCPH2 | 1.626 | 104.4 | 1.615 | 116.3 |
| HCSH | 1.634 | 112.03 | 1.629 | 109.8 |
| HCCl | 1.709 | 101.9 | 1.700 | 102.7 |
| C(NH2)2 | 1.334 | 113.5 | 1.337 | 112.3 |
| C(OH)2 | 1.325 | 105.1 | 1.324 | 105.2 |
| C(SH)2 | 1.654 | 124.6 | 1.697 | 111.8 |
| COHNH2 | 1.321 (CN)  1.351 (ON) | 107.7 | 1.322 (CN)  1.355 (CO) | 107.2 |
| CSHNH2 | 1.318 (CN)  1.748 (SN) | 111.9 | 1.319 (CN)  1.745 (CS) | 111.1 |

a: B3LYP results

b: MP2 results

**Supporting Information Table S3**

Calculated structural parameters (in angstrom and degrees) for ring compounds **1**-**4**.

|  | **a** | **b** | **c** | **d** | **E** | **** | **** | **** | **** | **** |
| --- | --- | --- | --- | --- | --- | --- | --- | --- | --- | --- |
| **1** | 1.366 | 1.381 | 1.367 | 1.381 | 1.366 | 100.1 | 114.6 | 105.4 | 105.4 | 114.6 |
| **2 (Y=S)** | 1.722 | 1.730 | 1.359 | 1.384 | 1.351 | 104.0 | 95.7 | 109.7 | 111.0 | 120.6 |
| **3** | 1.349 | 1.473 | 1.524 | 1.473 | 1.349 | 104.3 | 114.4 | 100.2 | 100.2 | 114.4 |
| **4** | 1.679 | 1.735 | 1.360 | 1.735 | 1.679 | 109.5 | 101.8 | 113.5 | 113.5 | 101.9 |
|  |  |  |  |  |  |  |  |  |  |  |
| **1** | 1.362 | 1.389 | 1.351 | 1.389 | 1.362 | 100.7 | 114.1 | 105.6 | 105.6 | 114.1 |
| **2 (Y=S)** | 1.727 | 1.751 | 1.344 | 1.393 | 1.345 | 104.5 | 95.2 | 108.5 | 111.6 | 120.3 |
| **3** | 1.354 | 1.478 | 1.542 | 1.478 | 1.354 | 103.9 | 115.9 | 100.9 | 100.9 | 115.9 |
| **4** | 1.681 | 1.761 | 1.341 | 1.761 | 1.681 | 110.2 | 101.2 | 113.7 | 113.7 | 101.2 |

**Supporting Information Table S4**

Calculated structural parameters (in angstrom and degrees) for ring compounds **5** and **6**.

|  | **a** | **b** | **c** | **d** | **e** | **F** | **** | **** | **** | **** | **** | **** |
| --- | --- | --- | --- | --- | --- | --- | --- | --- | --- | --- | --- | --- |
| **5** | 1.420 | 1.409 | 1.401 | 1.400 | 1.705 | 1.674 | 108.8 | 128.4 | 125.4 | 123.8 | 113.0 | 120.4 |
| **6** | 1.422 | 1.390 | 1.399 | 1.375 | 1.359 | 1.369 | 110.1 | 124.5 | 119.6 | 117.9 | 118.7 | 129.1 |
|  |  |  |  |  |  |  |  |  |  |  |  |  |
| **5** | 1.418 | 1.398 | 1.404 | 1.388 | 1.712 | 1.672 | 109.5 | 128.1 | 125.7 | 123.8 | 113.5 | 119.5 |
| **6** | 1.422 | 1.379 | 1.405 | 1.365 | 1.361 | 1.365 | 110.9 | 123.9 | 119.9 | 117.7 | 119.2 | 128.3 |

**Supporting Information Table S5**

Calculated structural parameters (in angstrom and degrees) for the dimers of ring compounds **1**-**4**.

|  | **a** | **b** | **c** | **d** | **e** | **C=C** | **** | **** | **** | **** | **** |
| --- | --- | --- | --- | --- | --- | --- | --- | --- | --- | --- | --- |
| **1** | 1.432 | 1.424 | 1.343 | 1.424 | 1.432 | 1.343 | 107.7 | 104.4 | 110.4 | 110.4 | 104.5 |
| **2 (Y=S)** | 1.775 | 1.773 | 1.342 | 1.396 | 1.415 | 1.345 | 110.6 | 89.2 | 111.9 | 115.4 | 111.0 |
| **3** | 1.430 | 1.471 | 1.528 | 1.471 | 1.430 | 1.337 | 111.8 | 105.3 | 104.1 | 104.1 | 105.3 |
| **4** | 1.766 | 1.753 | 1.341 | 1.753 | 1.766 | 1.353 | 114.5 | 93.6 | 117.7 | 117.7 | 93.6 |
|  |  |  |  |  |  |  |  |  |  |  |  |
| **1** | 1.432 | 1.422 | 1.332 | 1.422 | 1.432 | 1.333 | 108.7 | 105.1 | 110.4 | 110.4 | 105.1 |
| **2 (Y=S)** | 1.789 | 1.777 | 1.333 | 1.395 | 1.418 | 1.338 | 109.9 | 89.6 | 111.9 | 115.8 | 111.9 |
| **3** | 1.431 | 1.471 | 1.536 | 1.471 | 1.431 | 1.333 | 111.1 | 106.6 | 104.4 | 104.4 | 106.6 |
| **4** | 1.779 | 1.758 | 1.329 | 1.758 | 1.779 | 1.344 | 113.5 | 94.7 | 117.9 | 117.9 | 94.7 |

Calculated structural parameters (in angstrom and degrees) for the dimers of the ring compounds **5** and **6**.

|  | **A** | **b** | **c** | **d** | **e** | **f** | **C=C** | **** | **** | **** | **** | **** | **** |
| --- | --- | --- | --- | --- | --- | --- | --- | --- | --- | --- | --- | --- | --- |
| **5**a | 1.442 | 1.366 | 1.447 | 1.355 | 1.810 | 1.846 | 1.386 | 118.0 | 124.2 | 123.6 | 123.3 | 123.5 | 99.2 |
| **6** | 1.441 | 1.361 | 1.441 | 1.358 | 1.369 | 1.419 | 1.376 | 114.6 | 121.5 | 120.3 | 117.9 | 121.7 | 122.2 |
|  |  |  |  |  |  |  |  |  |  |  |  |  |  |
| **5** | 1.439 | 1.354 | 1.444 | 1.342 | 1.812 | 1.853 | 1.379 | 118.5 | 126.5 | 124.7 | 123.5 | 124.3 | 101.9 |
| **6** | 1.449 | 1.358 | 1.448 | 1.356 | 1.373 | 1.431 | 1.373 | 113.9 | 122.2 | 120.5 | 117.8 | 122.1 | 122.8 |

a MP2/6-31G* results
